# Supplementary material
Source: publisher site journal article supplement (https://www.dovepress.com/get_supplementary_file.php?f=330947.xlsx)
Supplement: Supplementary file 1 [file get_supplementary_file.php]

## Sheet: S1
Supplementary Table S1. Chemical constituents and the topological attributes of Four Herbal Medicines Constitutive of SX.
Name	Betweenness Centrality	Closeness Centrality	Degree
DXT	0.67328	0.518519	14
FLZXGP	0.031746	0.373333	2
JXT	0	0.321839	1
HGT	0	0.345679	1
β-sitosterol	0.595238	0.466667	11
(+)-catechin	0.17328	0.388889	5
ent-epicatechin	1	1	4
(−)-catechin gallate	0.526455	0.528302	3
liquiritigenin	0.031746	0.373333	2
dihydrochelerythrine	0	0.282828	1
N-methylflindersine	0	0.282828	1
skimmianine	0	0.321839	1
β-amyrin	0	0.321839	1
oxychelerythrine	0	0.321839	1
hesperidin	0	0.321839	1
hesperetin-7-O-rutinoside	0	0.321839	1
oxyavicine	0	0.321839	1
chelerythrine	0	0.321839	1
phellopterin	0	0.321839	1
cajanin	0	0.321839	1
licochalcone A	0	0.345679	1
medicagol	0	0.345679	1
formononetin	0	0.345679	1
7-oxo-β-sitosterol	0	0.345679	1
procyanidin B1	0	0.345679	1
medicarpin	0	0.345679	1
(+)-medioresinol	0	0.345679	1
taxifolin	0	0.345679	1
glycyroside	0	0.345679	1
calycosin	0	0.345679	1
β-sitosterol-3-O-β-D-glucopyranoside	0	0.571429	1
periplogenin	0	0.571429	1
eleutheroside A	0	0.571429	1
elexandrin	0	0.571429	1

## Sheet: S2
Supplementary Table S2. Detailed genetic information for Venn diagrams of SX drug targets and RA disease proteins
SX		RA		The intersection of A and B
Gene name	Uniprot ID	Gene name	UniProt ID	44 targets	UniProt ID
IL2	P60568	TNF	P01375	TNF	P01375
STAT3	P40763	PTPN22	Q9Y2R2	PTPN2	P17706
BCL2L1	Q07817	CRP	P02741	TYK2	P29597
PSENEN	Q9NZ42	IL6ST	P40189	IL6	P05231
NCSTN	Q92542	CD28	P10747	CXCL8	P10145
APH1A	Q96BI3	CD40	P25942	MIF	P14174
PSEN1	P49768	CCR6	P51684	MMP2	P08253
APH1B	Q8WW43	HLA-DPB1	P04440	ABCB1	P08183
PTPN1	P18031	IL2RA	P01589	PTGS2	P35354
PTAFR	P25105	IL6R	P08887	STAT1	P42224
S1PR3	Q99500	IRF5	Q13568	VEGFA	P15692
S1PR1	P21453	CIITA	P33076	ALOX5	P09917
PTPN2	P17706	STAT4	Q14765	PON1	P27169
CDC25B	P30305	TNFAIP3	P21580	PTGS1	P23219
ACP1	P24666	TRAF1	Q13077	MMP12	P39900
PFKFB3	Q16875	PADI4	Q9UM07	ADORA2A	P29274
RBP4	P02753	AGER	Q15109	STS	P08842
F2	P00734	AFF3	P51826	CTSD	P07339
PPM1B	O75688	NFKBIL1	Q9UBC1	HSD11B1	P28845
PPP1CC	P36873	PTPRC	P08575	F2	P00734
PPP2CA	P67775	REL	Q04864	NR3C1	P04150
PPP2R5A	Q15172	TRAF6	Q9Y4K3	ABCG2	Q9UNQ0
HSD11B2	P80365	PTPN2	P17706	MMP14	P50281
ATP12A	P54707	TYK2	P29597	CTSS	P25774
PPARG	P37231	CD244	Q9BZW8	HMGCR	P04035
CYP19A1	P11511	MMEL1	Q495T6	ADORA3	P0DMS8
CDC25A	P30304	IL2RB	P14784	ADAM17	P78536
TTL	Q8NG68	GATA3	P23771	SYK	P43405
PDCD4	Q53EL6	KIF5A	Q12840	CCR1	P32246
TAS2R31	P59538	NFKBIE	O00221	AKR1B1	P15121
ATP1A1	P05023	ANKRD55	Q3KP44	IL2	P60568
CDC25C	P30307	ARID5B	Q14865	S1PR1	P21453
PGR	P06401	ANXA3	P12429	ESRRA	P11474
RASGRP3	Q8IV61	CSF2	P04141	G6PD	P11413
F2RL1	P55085	CTLA4	P16410	PLA2G1B	P04054
GSK3A	P49840	DNASE1L3	Q13609	CXCR3	P49682
AR	P10275	RCAN1	P53805	MCL1	Q07820
RPS6KA5	O75582	ENO1	P06733	TYR	P14679
HSD11B1	P28845	FCGR2A	P12318	P2RX7	Q99572
AGTR1	P30556	HLA-DQA2	P01906	PDE4D	Q08499
RARG	P13631	HLA-DRB1	P01911	PDE4B	Q07343
RARA	P10276	IFNG	P01579	PDE4A	P27815
AMPD3	Q01432	IL1B	P01584	PPARA	Q07869
PTGER2	P43116	IL1RN	P18510	CCR2	P41597
THRA	P10827	IL6	P05231
THRB	P10828	CXCL8	P10145
AMPD1	P23109	IL10	P22301
RCE1	Q9Y256	IL18	Q14116
PLA2G4A	P47712	MIF	P14174
ACE	P12821	MMP2	P08253
ECE1	P42892	MTHFR	P42898
CYP17A1	P05093	TNFRSF11B	O00300
ALDH2	P05091	ABCB1	P08183
ESR1	P03372	PTGS2	P35354
ESR2	Q92731	SLC11A1	P49279
CBR1	P16152	SLC22A4	Q9H015
HSD17B2	P37059	STAT1	P42224
CA7	P43166	TLR2	O60603
CA12	O43570	VEGFA	P15692
CA4	P22748	CXCR4	P61073
TBXAS1	P24557	RASGRP1	O95267
HTR2C	P28335	FOXP3	Q9BZS1
ESRRA	P11474	IL23A	Q9NPF7
ESRRB	O95718	PLD4	Q96BZ4
ABCG2	Q9UNQ0	SPRED2	Q7Z698
EGFR	P00533	ACAN	P16112
HSD17B1	P14061	RUNX1	Q01196
ADORA2A	P29274	CYR61	O00622
ADORA1	P30542	CCL21	O00585
MAOA	P21397	TNFSF14	O43557
ABCB1	P08183	AHR	P35869
PTPRS	Q13332	TNFRSF14	Q92956
PTGS1	P23219	BLK	P51451
MGAM	O43451	ALOX5	P09917
CA2	P00918	CAT	P04040
TYR	P14679	CDK6	Q00534
NOX4	Q9NPH5	ADIPOQ	Q15848
MAOB	P27338	FASLG	P48023
CA1	P00915	CTGF	P29279
MIF	P14174	DHFR	P00374
HTR2A	P28223	IRAK1	P51617
PPARA	Q07869	PON1	P27169
ACHE	P22303	PTGS1	P23219
SLC6A2	P23975	TAGAP	Q8N103
GUSB	P08236	PLB1	Q6P1J6
CHRNA7	P36544	NCF1	P14598
EZR	P15311	ATIC	P31939
PIM2	Q9P1W9	PRDM1	O75626
PLAA	Q9Y263	COL2A1	P02458
ALOX15	P16050	MMP12	P39900
XDH	P47989	MPO	P05164
PON1	P27169	PRKCQ	Q04759
MTOR	P42345	SOD2	P04179
PIK3CA	P42336	GGH	Q92820
ALPL	P05186	CD83	Q01151
KDM1A	O60341	B3GNT2	Q9NY97
ALOX12	P18054	CP	P00450
ALOX5	P09917	FPGS	Q05932
PDPK1	O15530	GC	P02774
AKR1B1	P15121	IGFBP3	P17936
PTGS2	P35354	RBPJ	Q06330
NOS2	P35228	MMP10	P09238
APP	P05067	SMS	P52788
F3	P13726	GDF5	P43026
BACE1	P56817	IKZF3	Q9UKT9
ODC1	P11926	ACKR3	P25106
HDAC3	O15379	ADORA2A	P29274
HDAC6	Q9UBN7	GRK2	P25098
HDAC5	Q9UQL6	STS	P08842
HDAC7	Q8WUI4	BCL2A1	Q16548
HDAC8	Q9BY41	BGN	P21810
HDAC1	Q13547	BMP4	P12644
HDAC4	P56524	BMP6	P22004
HDAC9	Q9UKV0	CAV2	P51636
HDAC10	Q969S8	CD2	P06729
CTSD	P07339	CTSD	P07339
SLC5A1	P13866	FKBP5	Q13451
KCNA3	P22001	GRK6	P43250
PLA2G1B	P04054	HOXD13	P35453
PDK1	Q15118	HSD11B1	P28845
MDM4	O15151	CCL8	P80075
MDM2	Q00987	NR4A3	Q92570
CYP11B1	P15538	ABCC3	O15438
FLT3	P36888	GPRC5A	Q8NFJ5
CYP11B2	P19099	LHX2	P50458
JAK2	O60674	ABCC5	O15440
SLC29A1	Q99808	TXNDC5	Q8NBS9
TRPM8	Q7Z2W7	CLEC12A	Q5QGZ9
MAPKAPK2	P49137	BDKRB2	P30411
BCHE	P06276	CALD1	Q05682
PDGFRB	P09619	RUNX2	Q13950
BMP1	P13497	CD3E	P07766
VCP	P55072	CD5	P06127
NR1H4	Q96RI1	ABCC2	Q92887
ROCK2	O75116	HAPLN1	P10915
ROCK1	Q13464	DDX6	P26196
MMP9	P14780	GSDME	O60443
MMP8	P22894	F2	P00734
RPS6KB1	P23443	GART	P22102
HPGDS	O60760	NR3C1	P04150
SLC5A2	P31639	CXCL2	P19875
ICAM1	P05362	HCLS1	P14317
ITGAL	P20701	HOXD10	P28358
ITGB2	P05107	HOXD11	P31277
RAF1	P04049	IRF8	Q02556
CAPN1	P07384	ITGA6	P23229
BRAF	P15056	LCN2	P80188
ABL1	P00519	MARCKS	P29966
ADAM17	P78536	RAB8A	P61006
ERN1	O75460	NCF2	P19878
MAPK10	P53779	PLEK	P08567
HDAC11	Q96DB2	POU3F1	Q03052
MMP1	P03956	PSG5	Q15238
MAPK1	P28482	PTK2	Q05397
PDE10A	Q9Y233	RAP2A	P10114
GNRHR	P30968	CXCL6	P80162
ITK	Q08881	TLE3	Q04726
PRKCB	P05771	TMPO	P42166
RET	P07949	TNFAIP2	Q03169
MAPK14	Q16539	TFPI2	P48307
CHRNB2	P17787	SLC25A12	O75746
CHRNA4	P43681	ABCG2	Q9UNQ0
PSEN2	P49810	ABCC4	O15439
PSENEN	Q9NZ42	MAB21L2	Q9Y586
NCSTN	Q92542	TXNIP	Q9H3M7
ADORA2B	P29275	LY96	Q9Y6Y9
PLA2G2A	P14555	DDIT4	Q9NX09
NAAA	Q02083	GIN1	Q9NXP7
MMP13	P45452	PXK	Q7Z7A4
HCRTR2	O43614	BAIAP2L1	Q9UHR4
ADAM10	O14672	NDUFA4L2	Q9NRX3
NCOR2	Q9Y618	ST6GALNAC5	Q9BVH7
FASN	P49327	MGARP	Q8TDB4
TACR3	P29371	B3GNT9	Q6UX72
NPY5R	Q15761	RGMB	Q6NW40
PDE4B	Q07343	MMP14	P50281
PIM1	P11309	ZFP36	P26651
HTR1A	P08908	DNASE2	O00115
ADRA1B	P35368	ZAP70	P43403
P2RX3	P56373	HNRNPA2B1	P22626
PIM3	Q86V86	HLA-C	P04222
IMPDH1	P20839	ISG20	Q96AZ6
PTPN6	P29350	ACP5	P13686
NPC1L1	Q9UHC9	HLA-DQB1	P01920
NR1H3	Q13133	HLA-DMB	P28068
RORC	P51449	TAP2	Q03519
HMGCR	P04035	C5	P01031
SHBG	P04278	AIRE	O43918
CYP51A1	Q16850	C5orf30	Q96GV9
SREBF2	Q12772	MICA	Q29983
RORA	P35398	JAK-2	Q90WEB
CYP2C19	P33261	JAK-1	Q9N147
SERPINA6	P08185	CD20	P11836
G6PD	P11413	CTSK	P43235
SLC6A4	P31645	CTSL	P07711
CHRM2	P08172	CTSB	P07858
NR1I3	Q14994	CTSS	P25774
NR1H2	P55055	PTK	P37101
DHCR7	Q9UBM7	COX-2	Q6ZYK7
PTGER1	P34995	p38 beta	A0A510GDE6
VDR	P11473	p38 alpha	Q8T060
PTGES	O14684	MAPK12	P53778
PPARD	Q03181	ROCK2	O75116
CES2	O00748	CELA1	Q9UNI1
SQLE	Q14534	NE	F7JO71
GLRA1	P23415	Malaria DHOdehase	Q9X986
UGT2B7	P16662	HMGCR	P04035
POLB	P06746	MMP-9	Q9QWS6
TLR9	Q9NR96	ADORA3	P0DMS8
TNKS2	Q9H2K2	FCGR2B	P31994
TNKS	O95271	CD19	P15391
CA3	P07451	ATP2A	Q07405
CA6	P23280	SIRT1	Q96EB6
CA14	Q9ULX7	COX-1	P22437
CA13	Q8N1Q1	RIPK1	Q13546
CA5B	Q9Y2D0	GCR	A0A411AGV5
CA5A	P35218	CD40LG	P29965
DHODH	Q02127	IL12B	P29460
STS	P08842	TXNRD1	Q16881
ERCC5	P28715	ATK	Q06187
FEN1	P39748	HIV tat	A0A059WM56
CA9	Q16790	JAK-3	P52333
IDO1	P14902	IL15	P40993
PRKCH	P24723	KLRK1	P26718
PTPN11	Q06124	H4R	P84040
AKR1B10	O60218	LOX5	Q9LUW0
NR3C1	P04150	MMP-13	P45452
TNF	P01375	MMP-1	P03956
SLC6A3	Q01959	ADAM17	P78536
FDFT1	P37268	IL17	Q16552
SIGMAR1	Q99720	SYK	P43405
MAPK3	P27361	SLC36A2	Q495M3
ADORA3	P0DMS8	SLC6A14	Q9UN76
SRD5A2	P31213	NIE	Q6TR70
NR3C2	P08235	CCR1	P32246
FABP1	P07148	IL1R1	P14778
FNTA	P49354	COX	P07695
FNTB	P49356	CD86	P42081
NR1I2	O75469	CD80	P33681
CES1	P23141	AKR1B1	P15121
PTGIR	P43119	BACE	P56817
PREP	P48147	p38	Q9LDA4
TOP2A	P11388	ITGB7	P26010
HSD17B3	P37058	ITGA4	P13612
PDE4D	Q08499	PNP	P00491
FABP4	P15090	IL2	P60568
TERT	O14746	C5AR1	P27130
FABP3	P05413	S1PR1	P21453
FABP5	Q01469	ESRRA	P11474
MAPK8	P45983	JUN	P05412
MAST3	O60307	CD4	P01730
DRD2	P14416	G6PD	P11413
FAAH	O00519	MAPKAPK5	Q8IW41
CNR1	P21554	PLA2G1B	P04054
PTGFR	P43088	CO5	Q8LGM4
MPEG1	Q2M385	LTB4R	Q15722
PTPRF	P10586	IL1R2	P27930
PTGER3	P43115	IL1A	P01583
XIAP	P98170	IL17R	Q96F46
KAT2B	Q92831	CXCR3	P49682
SLC22A6	Q4U2R8	OSM	P13725
PDE4A	P27815	MCL1	Q07820
PDE4C	Q08493	TYR	P14679
CXCR3	P49682	CTLA-4	P09496
GABRB3	P28472	TNF-R1	P22934
GABRA3	P34903	P2RX7	Q99572
IL6	P05231	NF-KB	A0A510GAH8
GLUL	P15104	HDAC	Q54VQ7
TOP1	P11387	IL1	B5U152
LSS	P48449	BDKRB1	P46663
NCOA2	Q15596	CRF	O75973
PGF	P49763	CSF2RA	P15509
VEGFA	P15692	CAMK2	Q13554
MMP2	P08253	FAS	P49327
MMP12	P39900	NKG2A	P26715
BCL2	P10415	LTBR	P36941
KIT	P10721	TWEAK	Q4ACW9
MAPT	P10636	TSPO	P30536
PGD	P52209	SGPL1	O95470
ST3GAL3	Q11203	VLA-1	P0CY06
FUT7	Q11130	EBP	Q15125
FUT4	P22083	IL-23	B2MU62
KDR	P35968	LTA	P01374
GABRB2	P47870	CSF-1	B5DC98
MET	P08581	CASP1	P29466
DNM1	Q05193	OPRD1	P41143
SRC	P12931	PDE4D	Q08499
PLA2G5	P39877	PDE4B	Q07343
PLA2G10	O15496	PDE4A	P27815
CYP1B1	Q16678	SPLA2	A0A4D9ANY5
KLK1	P06870	ITGAV	P06756
KLK2	P20151	ITGB3	P05106
FGFR1	P11362	MMP-8	P22894
HIF1A	Q16665	PPARA	Q07869
ERBB2	P04626	CCL2	P13500
MMP14	P50281	CCR2	P41597
GSK3B	P49841	CB2	A5X493
CHEK1	O14757	PRO	Q9NRZ3
WEE1	P30291	CCR5	P51681
MAP2K1	Q02750	MMP	O04529
JAK3	P52333	MMP-3	P08254
LCK	P06239	CADM	G9C9X0
ALK	Q9UM73	CDH11	P55287
HTT	P42858	S1PR	Q95UN8
MKNK1	Q9BUB5	TLR	Q800U9
HDAC2	Q92769	IFNB1	P01574
DAO	P14920
EIF4A1	P60842
PARP1	P09874
COMT	P21964
LNPEP	Q9UIQ6
CDK2	P24941
CASP3	P42574
MMP3	P08254
CASP7	P55210
MMP7	P09237
PLK1	P53350
HSD17B14	Q9BPX1
TYMS	P04818
CDK4	P11802
CCND3	P30281
PIK3CD	O00329
PIK3CB	P42338
PIK3CG	P48736
PRKDC	P78527
HCK	P08631
SYK	P43405
GSTP1	P09211
RPS6KA2	Q15349
GSTM2	P28161
KDM4C	Q9H3R0
TUBB1	Q9H4B7
PIK3R1	P27986
TUBB3	Q13509
EPHB2	P29323
GRIA1	P42261
IRAK4	Q9NWZ3
GCK	P35557
DGAT1	O75907
GABRA5	P31644
GABRB3	P28472
GABRG2	P28472
PIK3CA	P42336
CTSS	P25774
PGK1	P00558
MBD2	Q9UBB5
EPHA3	P29320
EPHB4	P54760
MCL1	Q07820
MAPK9	P45984
CNR2	P34972
RELA	Q04206
MTTP	P55157
APOB	P04114
DUSP3	P51452
CDC7	O00311
ABCC1	P33527
PLAT	P00750
F10	P00742
PLAU	P00749
HSP90AB1	P08238
PRSS1	P07477
CHRM3	P20309
CHRM1	P11229
CHRM5	P08912
CHRM4	P08173
GABRA1	P14867
ADRA1A	P35348
GYS1	P13807
PDE5A	O76074
P2RX7	Q99572
PTPRG	P23470
EDNRA	P25101
TLR4	O00206
DRD3	P35462
PDE7A	Q13946
AOC3	Q16853
TMIGD3	P0DMS9
CCR2	P41597
EPHX1	P07099
CXCL8	P10145
MTNR1A	P48039
MTNR1B	P49286
HTR6	P50406
CD38	P28907
IMPDH2	P12268
CCKBR	P32239
CLK4	Q9HAZ1
AURKB	Q96GD4
CCR1	P32246
CCR4	P51679
AURKA	O14965
CSF1R	P07333
CSNK1D	P48730
TGFBR1	P36897
PTK2B	Q14289
ELANE	P08246
DRD4	P21917
SCD	O00767
FNTA	P49354
CD81	P60033
KCNH2	Q12809
PGH2	P35354
SRD5A1	P18405
SLC28A3	Q9HAS3
TDP1	Q9NUW8
SLC5A4	Q9NY91
EPHX2	P34913
PGH1	P23219
FA10	P00742
RXRA	P19793
GABRA2	P47869
JAK1	P23458
TYK2	P29597
NUDT1	P36639
CDK1	P06493
CCNB1	P14635
MCHR1	Q99705
DUT	P33316
CCNE2	O96020
CCNE1	P24864
PDE8B	O95263
TAAR1	Q96RJ0
HCAR2	Q8TDS4
SLC9A1	P19634
HSF1	Q00613
DNMT3A	Q9Y6K1
CDK4	P11802
CCND2	P30279
CYP1A2	P05177
KCNA5	P22460
PLA2G7	Q13093
HSP90AA1	P07900
HRH3	Q9Y5N1
HRH4	Q9H3N8
CRHR1	P34998
PDE2A	O00408
DYRK1A	Q13627
DNMT1	P26358
STAT1	P42224
GABRB2	P47870
AKR1C3	P42330
GRM5	P41594
SERPINE1	P05121
CLK1	P49759
DYRK1B	Q9Y463
PTGER4	P35408
YWHAG	P61981
NQO2	P16083
HNF4A	P41235
GRM2	Q14416
CCNE1	P24864
IGF1R	P08069
INSR	P06213
CDK3	Q00526
SLC28A2	O43868
HRAS	P01112

## Sheet: S3
Supplementary Table S3. The topological attributes of PPI network of RA target of SX
Gene name	Betweenness Centrality	Closeness Centrality	Degree
TNF	0.247394	0.839286	38
IL6	0.142905	0.770492	34
VEGFA	0.179687	0.783333	34
CXCL8	0.076333	0.701493	28
PTGS2	0.0387691	0.652778	23
IL2	0.0304756	0.618421	20
STAT1	0.047828	0.61039	19
MMP2	0.0099188	0.566265	14
CCR2	0.00278236	0.559524	13
F2	0.0107816	0.552941	12
TIMP2	0.0374431	0.546512	11
ADORA3	0.0037172	0.54023	11
ADAM17	0.00096692	0.54023	10
NR3C1	0.0438004	0.546512	10
CXCR3	0.00044565	0.54023	10
CCR1	0.00044565	0.54023	10
S1PR1	0.00044969	0.534091	10
MMP14	0.00036342	0.534091	9
ALOX5	0.00118937	0.52809	9
MCL1	0.00058281	0.534091	9
ABCB1	0.0114097	0.52809	9
PPARA	0.0107888	0.516484	8
PTGS1	0.00277583	0.522222	8
PLA2G1B	0.00181343	0.522222	8
SYK	0.0004763	0.522222	7
MMP12	0.00036709	0.522222	7
PPARGC1A	0.00374617	0.505376	6
PTPN2	0.00270583	0.5	6
MIF	0	0.51087	6
ADORA2A	0.00087041	0.51087	6
SERPINC1	0	0.505376	5
TYK2	0.00067692	0.5	5
PON1	0.0015576	0.489583	5
AKR1B1	0.00240591	0.51087	5
PDE4A	0.00045483	0.5	5
P2RX7	0.00015418	0.505376	5
ESRRA	0.00030836	0.401709	4
RIPK1	0.00044051	0.489583	4
TRAF2	0.00078557	0.484536	4
CTSD	0.00783392	0.479592	4
TYR	0.00030836	0.47	4
G6PD	0.00943057	0.465347	4
HMGCR	0.0007663	0.465347	4
PDE4B	0.0425532	0.494737	3
ABCG2	0.00015418	0.465347	3
CTSS	0	0.358779	2
HSD11B1	0.00058588	0.364341	2
PDE4D	0	0.333333	1

## Sheet: S4
Supplementary Table S4. GO of the Putative Targets of SX in RA Treatment
Category	Term	Count	PValue	Genes
GOTERM_BP_FAT	GO:0010033~response to organic substance	15	1.21e-08	PPARA, IL6, STS, TNF, PTGS2, MCL1, PTPN2, ADORA2A, PTGS1, NR3C1, MMP14, STAT1, P2RX7, PLA2G1B, ADAM17
GOTERM_BP_FAT	GO:0042127~regulation of cell proliferation	15	3.67e-08	STS, IL6, ESRRA, TNF, PTGS2, ADORA2A, PTGS1, STAT1, MMP12, S1PR1, VEGFA, PLA2G1B, ADAM17, SYK, IL2
GOTERM_BP_FAT	GO:0007166~cell surface receptor linked signal transduction	15	0.000743	ADORA3, ADORA2A, PTPN2, CCR1, CXCR3, STAT1, MIF, P2RX7, S1PR1, F2, CCR2, VEGFA, ADAM17, SYK, IL2
GOTERM_BP_FAT	GO:0044093~positive regulation of molecular function	13	9.73e-08	P2RX7, IL6, TNF, ADORA3, S1PR1, ADORA2A, F2, PLA2G1B, PON1, ADAM17, STAT1, IL2, SYK
GOTERM_BP_FAT	GO:0042981~regulation of apoptosis	13	2.85e-06	P2RX7, IL6, TNF, PTGS2, MCL1, ADORA2A, VEGFA, F2, ADAM17, NR3C1, STAT1, MIF, IL2
GOTERM_BP_FAT	GO:0043067~regulation of programmed cell death	13	3.16e-06	P2RX7, IL6, TNF, PTGS2, MCL1, ADORA2A, VEGFA, F2, ADAM17, NR3C1, STAT1, MIF, IL2
GOTERM_BP_FAT	GO:0010941~regulation of cell death	13	3.28e-06	P2RX7, IL6, TNF, PTGS2, MCL1, ADORA2A, VEGFA, F2, ADAM17, NR3C1, STAT1, MIF, IL2
GOTERM_BP_FAT	GO:0009719~response to endogenous stimulus	12	2.13e-08	PPARA, STS, IL6, TNF, PTGS2, ADORA2A, PTPN2, PTGS1, PLA2G1B, ADAM17, MMP14, STAT1
GOTERM_BP_FAT	GO:0008284~positive regulation of cell proliferation	12	2.67e-08	STS, IL6, TNF, S1PR1, PTGS2, VEGFA, PLA2G1B, ADAM17, STAT1, MMP12, IL2, SYK
GOTERM_BP_FAT	GO:0009611~response to wounding	12	3.27e-07	PPARA, P2RX7, IL6, TNF, ADORA3, ADORA2A, CCR1, CCR2, F2, ADAM17, ALOX5, MIF
GOTERM_CC_FAT	GO:0005886~plasma membrane	22	0.00127078	IL6, STS, TNF, ADORA3, PTGS2, ADORA2A, CCR1, PTGS1, ABCB1, CXCR3, MMP14, MMP2, ABCG2, P2RX7, S1PR1, G6PD, PDE4A, F2, CCR2, ADAM17, ALOX5, SYK
GOTERM_CC_FAT	GO:0044459~plasma membrane part	16	0.0013252	IL6, TNF, ADORA3, PTGS2, ADORA2A, CCR1, ABCB1, CXCR3, MMP14, P2RX7, S1PR1, G6PD, PDE4A, CCR2, ADAM17, SYK
GOTERM_CC_FAT	GO:0000267~cell fraction	14	1.08e-05	STS, PTGS2, HMGCR, ADORA2A, PTGS1, ABCB1, PDE4D, P2RX7, PDE4A, F2, CCR2, PDE4B, PON1, ALOX5
GOTERM_CC_FAT	GO:0005576~extracellular region	14	0.0050388	IL6, TNF, CTSS, MMP14, MMP2, MMP12, MIF, AKR1B1, F2, VEGFA, PON1, PLA2G1B, CTSD, IL2
GOTERM_CC_FAT	GO:0044421~extracellular region part	12	9.58e-05	IL6, TNF, VEGFA, F2, AKR1B1, PLA2G1B, PON1, MMP14, MMP2, MMP12, MIF, IL2
GOTERM_CC_FAT	GO:0005626~insoluble fraction	11	0.000156	P2RX7, STS, PTGS2, HMGCR, ADORA2A, PDE4A, PDE4B, PTGS1, PON1, ABCB1, PDE4D
GOTERM_CC_FAT	GO:0005615~extracellular space	10	0.000172	IL6, TNF, VEGFA, F2, AKR1B1, PLA2G1B, PON1, MMP2, MIF, IL2
GOTERM_CC_FAT	GO:0005887~integral to plasma membrane	10	0.00821953	P2RX7, IL6, TNF, ADORA3, ADORA2A, CCR1, CCR2, ADAM17, CXCR3, MMP14
GOTERM_CC_FAT	GO:0031226~intrinsic to plasma membrane	10	0.00948103	P2RX7, IL6, TNF, ADORA3, ADORA2A, CCR1, CCR2, ADAM17, CXCR3, MMP14
GOTERM_CC_FAT	GO:0005624~membrane fraction	9	0.00264499	P2RX7, STS, PTGS2, HMGCR, ADORA2A, PDE4A, PTGS1, PON1, ABCB1
GOTERM_MF_FAT	GO:0008289~lipid binding	9	8.19e-05	PPARA, ESRRA, S1PR1, PTGS2, PTGS1, PLA2G1B, PON1, NR3C1, IL2
GOTERM_MF_FAT	GO:0046983~protein dimerization activity	9	0.000295	P2RX7, TYR, G6PD, MCL1, HMGCR, ADORA2A, VEGFA, PON1, ABCG2
GOTERM_MF_FAT	GO:0042802~identical protein binding	8	0.00409363	P2RX7, TYR, G6PD, TNF, HMGCR, VEGFA, PON1, ABCG2
GOTERM_MF_FAT	GO:0005509~calciumion binding	8	0.026636	STS, F2, PLA2G1B, ALOX5, MMP14, STAT1, MMP2, MMP12
GOTERM_MF_FAT	GO:0042803~protein homodimerization activity	7	0.000665	P2RX7, TYR, G6PD, HMGCR, VEGFA, PON1, ABCG2
GOTERM_MF_FAT	GO:0070011~peptidase activity, acting on L-amino acid peptides	7	0.00798775	F2, ADAM17, CTSD, CTSS, MMP14, MMP2, MMP12
GOTERM_MF_FAT	GO:0008233~peptidase activity	7	0.00984065	F2, ADAM17, CTSD, CTSS, MMP14, MMP2, MMP12
GOTERM_MF_FAT	GO:0004175~endopeptidase activity	7	0.00121428	F2, ADAM17, CTSD, CTSS, MMP14, MMP2, MMP12
GOTERM_MF_FAT	GO:0005125~cytokine activity	5	0.00353618	IL6, TNF, VEGFA, MIF, IL2
GOTERM_MF_FAT	GO:0008237~metallopeptidase activity	4	0.0211482	ADAM17, MMP14, MMP2, MMP12

## Sheet: S5
Supplementary Table S5. KEGG Pathway Enrichment Analysis of the Putative Targets of SX in RA Treatment
Category	Term	Count	Genes
KEGG_PATHWAY	Neuroactive ligand-receptor interaction	7	P2RX7, S1PR1, ADORA3, ADORA2A, F2, NR3C1, OPRD1
KEGG_PATHWAY	PI3K-Akt signaling pathway	7	IL6, MCL1, VEGFA, CDK6, ITGA4, SYK, IL2
KEGG_PATHWAY	Sphingolipid signaling pathway	6	S1PR1, ADORA3, TNF, ROCK2, CTSD, OPRD1
KEGG_PATHWAY	cAMP signaling pathway	6	PPARA, ROCK2, ADORA2A, PDE4A, PDE4B, PDE4D
KEGG_PATHWAY	MicroRNAs in cancer	6	PTGS2, MCL1, VEGFA, ABCB1, CDK6, SIRT1
KEGG_PATHWAY	Tuberculosis	5	IL6, TNF, CTSD, CTSS, SYK
KEGG_PATHWAY	Cytokine-cytokine receptor interaction	5	IL6, TNF, CCR1, CXCR3, IL2
KEGG_PATHWAY	Proteoglycans in cancer	5	CTSL, TNF, ROCK2, VEGFA, MMP2
KEGG_PATHWAY	Arachidonic acid metabolism	4	PTGS2, PTGS1, PLA2G1B, ALOX5
KEGG_PATHWAY	Morphine addiction	4	PDE4A, PDE4B, GRK6, PDE4D
KEGG_PATHWAY	Rheumatoid arthritis	4	CTSL, IL6, TNF, VEGFA
KEGG_PATHWAY	TNF signaling pathway	4	IL6, TNF, PTGS2, MMP14
KEGG_PATHWAY	Measles	4	TYK2, IL6, CDK6, IL2
KEGG_PATHWAY	Graft-versus-host disease	3	IL6, TNF, IL2
KEGG_PATHWAY	Intestinal immune network for IgA production	3	IL6, ITGA4, IL2
KEGG_PATHWAY	NOD-like receptor signaling pathway	3	IL6, TNF, CASP1
KEGG_PATHWAY	Legionellosis	3	IL6, TNF, CASP1
KEGG_PATHWAY	Inflammatory bowel disease (IBD)	3	IL6, TNF, IL2
KEGG_PATHWAY	secretion	3	HMGCR, ABCB1, ABCG2
KEGG_PATHWAY	Leishmaniasis	3	TNF, PTGS2, ITGA4

## Sheet: S6
Supplementary Table S8. Analysis results of Lipinski rule data
Molecular ID	Molecular Weight	Hydrogen bond donor	Hydrogen bond acceptor	Rotatable bonds	CLogP
MOL000087	576.85	4	6	9	4.98
MOL000357	576.85	4	6	9	5.17
MOL000358	414.71	1	1	6	5.05
MOL000392	268.26	1	4	2	2.49
MOL000417	284.26	2	5	2	2.4
MOL000469	428.69	1	2	6	4.74
MOL000497	338.4	2	4	6	2.7
MOL000502	300.26	3	6	2	2.07
MOL002565	270.28	1	4	1	2.57
MOL002663	259.26	0	5	3	2.78
MOL005658	390.51	3	5	1	2.75
MOL006504	442.37	7	10	4	1.59
MOL010801	426.72	1	1	0	4.63
Notes: The Lipinski rule of five are the five basic rules for screening drug-like molecules proposed by Pfizer’s senior medicinal chemist Christopher Lipinski in 19971. In the discovery setting ‘the rule of 5’ predicts that poor absorption or permeation is more likely when there are more than 5 H-bond donors, 10 H-bond acceptors, the molecular weight (MWT) is greater than 500 and the calculated L…

## Sheet: S7
Supplementary Table S7. Median (minimum, maximum) analysis of AI scores in CIA rats
Group	7 d	14 d	23 d	30 d	37 d
Nor group	0（0,0）	0（0,0）	0（0,0）	0（0,0）	0（0,0）
Mod group	4(3,4)	3.5(3,4)	4(3,4)	3.5(3,4)	4(3,4)
GTW group	3.5(3,4)	3.5(3,4)	2.5(2,3)	1(1,2)	0(0,1)
SX 40 g/kg group	4(3,4)	4(3,4)	3(2,3)	1.5(1,2)	0.5(0,1)
SX 20 g/kg group	4(3,4)	3.5(3,4)	3(2,4)	2(1,3)	1(1,2)
SX 10 g/kg group	4(3,4)	4(3,4)	3(3,4)	3(2,3)	2(1,3)

## Sheet: S8
Supplementary Table S8. Fold change of NF-κBp65, STAT1, PTGS2, PI3K, AKT and VEGF-A gene expression
Gene name	Group	Fold change
AKT	Mod VS Nor	3.883
	GTW VS Nor	1.19
	SX 40g/kg VS Nor	0.823
	SX 20g/kg VS Nor	2.118
	SX 10g/kg VS Nor	3.253
NF-κB p65	Mod VS Nor	1.887
	GTW VS Nor	1.003
	SX 40g/kg VS Nor	1.13
	SX 20g/kg VS Nor	1.512
	SX 10g/kg VS Nor	1.883
PI3K	Mod VS Nor	2.477
	GTW VS Nor	1.183
	SX 40g/kg VS Nor	1.093
	SX 20g/kg VS Nor	1.713
	SX 10g/kg VS Nor	2.097
PTGS2	Mod VS Nor	2.41
	GTW VS Nor	1.057
	SX 40g/kg VS Nor	1.123
	SX 20g/kg VS Nor	1.7067
	SX 10g/kg VS Nor	2.23
STAT1	Mod VS Nor	2.553
	GTW VS Nor	0.857
	SX 40g/kg VS Nor	0.822
	SX 20g/kg VS Nor	1.517
	SX 10g/kg VS Nor	2.587
VEGF-A	Mod VS Nor	3.22
	GTW VS Nor	1.25
	SX 40g/kg VS Nor	0.57
	SX 20g/kg VS Nor	1.85
	SX 10g/kg VS Nor	0.46
